# Supplementary material for: Sexual reproduction in a natural Trypanosoma cruzi population
Source: PubMed Central journal article supplement (PMC6544315; doi:10.1371/journal.pntd.0007392), 2019-05-20
Supplement: pntd.0007392.s009.pdf [file pntd.0007392.s009.pdf]

| Sample ID | District   | Block | Year Collected | SRA Accession Number |
|-----------|------------|-------|----------------|----------------------|
| TC125     | Bustamante | 1     | 2012           | SRS4304930           |
| TC126     | Bustamante | 1     | 2012           | SRS4304931           |
| TC119     | Cayma      | 1     | 2011           | SRS4304925           |
| TC122     | Cayma      | 2     | 2011           | SRS4304927           |
| TC135     | Huanca     | N/A   | 2013           | SRS4304983           |
| TC141     | Huanca     | N/A   | 2015           | SRS4304887           |
| TC142     | Huanca     | N/A   | 2015           | SRS4304884           |
| TC143     | Huanca     | N/A   | 2015           | SRS4304885           |
| TC144     | Huanca     | N/A   | 2015           | SRS4304882           |
| TC145     | Huanca     | N/A   | 2015           | SRS4304883           |
| TC146     | Huanca     | N/A   | 2015           | SRS4304890           |
| TC148     | Huanca     | N/A   | 2015           | SRS4304907           |
| TC149     | Huanca     | N/A   | 2015           | SRS4304906           |
| TC150     | Huanca     | N/A   | 2015           | SRS4304909           |
| TC151     | Huanca     | N/A   | 2015           | SRS4304908           |
| TC152     | Huanca     | N/A   | 2015           | SRS4304903           |
| TC001     | La Joya    | 4     | 2008           | SRS4304935           |
| TC002     | La Joya    | 4     | 2008           | SRS4304934           |
| TC003     | La Joya    | 5     | 2008           | SRS4304939           |
| TC004     | La Joya    | 6     | 2008           | SRS4304938           |
| TC014     | La Joya    | 3     | 2008           | SRS4304936           |
| TC015     | La Joya    | 7     | 2008           | SRS4304941           |
| TC016     | La Joya    | 4     | 2008           | SRS4304940           |
| TC019     | La Joya    | 6     | 2008           | SRS4304959           |
| TC020     | La Joya    | 4     | 2008           | SRS4304958           |
| TC022     | La Joya    | 2     | 2008           | SRS4304956           |
| TC023     | La Joya    | 9     | 2008           | SRS4304955           |
| TC026     | La Joya    | 4     | 2008           | SRS4304954           |
| TC027     | La Joya    | 6     | 2008           | SRS4304953           |
| TC029     | La Joya    | 6     | 2008           | SRS4304952           |
| TC031     | La Joya    | 9     | 2008           | SRS4304961           |
| TC033     | La Joya    | 6     | 2008           | SRS4304960           |
| TC034     | La Joya    | 8     | 2008           | SRS4304946           |
| TC035     | La Joya    | 9     | 2008           | SRS4304947           |
| TC036     | La Joya    | 9     | 2008           | SRS4304944           |

|       |                |    |      |            |
|-------|----------------|----|------|------------|
| TC037 | La Joya        | 6  | 2008 | SRS4304945 |
| TC038 | La Joya        | 9  | 2008 | SRS4304950 |
| TC039 | La Joya        | 9  | 2008 | SRS4304951 |
| TC040 | La Joya        | 1  | 2008 | SRS4304948 |
| TC129 | La Joya        | 1  | 2013 | SRS4304989 |
| TC130 | La Joya        | 1  | 2013 | SRS4304988 |
| TC131 | La Joya        | 1  | 2013 | SRS4304987 |
| TC147 | La Joya        | 1  | 2015 | SRS4304891 |
| TC155 | La Joya        | 1  | 2015 | SRS4304904 |
| TC010 | Mariano Melgar | 5  | 2008 | SRS4304937 |
| TC041 | Mariano Melgar | 5  | 2010 | SRS4304942 |
| TC042 | Mariano Melgar | 2  | 2010 | SRS4304943 |
| TC043 | Mariano Melgar | 2  | 2010 | SRS4304914 |
| TC044 | Mariano Melgar | 6  | 2010 | SRS4304916 |
| TC045 | Mariano Melgar | 2  | 2010 | SRS4304919 |
| TC046 | Mariano Melgar | 7  | 2010 | SRS4304918 |
| TC047 | Mariano Melgar | 7  | 2010 | SRS4304921 |
| TC048 | Mariano Melgar | 7  | 2010 | SRS4304920 |
| TC049 | Mariano Melgar | 5  | 2010 | SRS4304913 |
| TC055 | Mariano Melgar | 6  | 2010 | SRS4304894 |
| TC061 | Mariano Melgar | 2  | 2010 | SRS4304874 |
| TC064 | Mariano Melgar | 4  | 2010 | SRS4304878 |
| TC065 | Mariano Melgar | 7  | 2011 | SRS4304860 |
| TC068 | Mariano Melgar | 12 | 2011 | SRS4304881 |
| TC069 | Mariano Melgar | 12 | 2011 | SRS4304868 |
| TC070 | Mariano Melgar | 2  | 2011 | SRS4304869 |
| TC071 | Mariano Melgar | 1  | 2011 | SRS4304866 |
| TC072 | Mariano Melgar | 3  | 2011 | SRS4304867 |
| TC073 | Mariano Melgar | 2  | 2011 | SRS4304864 |
| TC074 | Mariano Melgar | 3  | 2011 | SRS4304865 |
| TC075 | Mariano Melgar | 2  | 2011 | SRS4304862 |
| TC076 | Mariano Melgar | 5  | 2011 | SRS4304863 |
| TC077 | Mariano Melgar | 5  | 2011 | SRS4304870 |
| TC078 | Mariano Melgar | 5  | 2011 | SRS4304871 |
| TC079 | Mariano Melgar | 2  | 2011 | SRS4304854 |
| TC080 | Mariano Melgar | 5  | 2011 | SRS4304853 |
| TC081 | Mariano Melgar | 7  | 2011 | SRS4304856 |
| TC082 | Mariano Melgar | 7  | 2011 | SRS4304855 |
| TC083 | Mariano Melgar | 7  | 2011 | SRS4304850 |

|       |                |    |      |            |
|-------|----------------|----|------|------------|
| TC084 | Mariano Melgar | 7  | 2011 | SRS4304849 |
| TC085 | Mariano Melgar | 7  | 2011 | SRS4304852 |
| TC086 | Mariano Melgar | 7  | 2011 | SRS4304851 |
| TC088 | Mariano Melgar | 6  | 2011 | SRS4304859 |
| TC089 | Mariano Melgar | 7  | 2011 | SRS4304858 |
| TC090 | Mariano Melgar | 6  | 2011 | SRS4304972 |
| TC091 | Mariano Melgar | 7  | 2011 | SRS4304973 |
| TC092 | Mariano Melgar | 7  | 2011 | SRS4304974 |
| TC095 | Mariano Melgar | 12 | 2011 | SRS4304975 |
| TC097 | Mariano Melgar | 6  | 2011 | SRS4304976 |
| TC098 | Mariano Melgar | 8  | 2011 | SRS4304977 |
| TC099 | Mariano Melgar | 6  | 2011 | SRS4304980 |
| TC100 | Mariano Melgar | 9  | 2011 | SRS4304861 |
| TC101 | Mariano Melgar | 11 | 2011 | SRS4304978 |
| TC102 | Mariano Melgar | 6  | 2011 | SRS4304979 |
| TC103 | Mariano Melgar | 7  | 2011 | SRS4304971 |
| TC104 | Mariano Melgar | 5  | 2011 | SRS4304970 |
| TC105 | Mariano Melgar | 3  | 2011 | SRS4304969 |
| TC107 | Mariano Melgar | 6  | 2011 | SRS4304967 |
| TC108 | Mariano Melgar | 11 | 2011 | SRS4304966 |
| TC110 | Mariano Melgar | 10 | 2011 | SRS4304965 |
| TC111 | Mariano Melgar | 5  | 2011 | SRS4304964 |
| TC112 | Mariano Melgar | 5  | 2011 | SRS4304963 |
| TC115 | Mariano Melgar | 1  | 2011 | SRS4304923 |
| TC116 | Mariano Melgar | 5  | 2011 | SRS4304924 |
| TC124 | Mariano Melgar | 7  | 2012 | SRS4304929 |
| TC051 | Miraflores     | 1  | 2010 | SRS4304898 |
| TC132 | Miraflores     | 3  | 2013 | SRS4304986 |
| TC133 | Miraflores     | 2  | 2013 | SRS4304985 |
| TC134 | Miraflores     | 2  | 2013 | SRS4304984 |
| TC136 | Miraflores     | 4  | 2014 | SRS4304982 |
| TC137 | Miraflores     | 4  | 2014 | SRS4304981 |
| TC067 | Sachaca        | 1  | 2011 | SRS4304857 |
| TC106 | Sachaca        | 1  | 2011 | SRS4304968 |
| TC113 | Sachaca        | 2  | 2011 | SRS4304962 |
| TC114 | Sachaca        | 2  | 2011 | SRS4304922 |
| TC123 | Sachaca        | 1  | 2012 | SRS4304928 |
| TC053 | Tiabaya        | 1  | 2010 | SRS4304900 |
| TC057 | Tiabaya        | 1  | 2010 | SRS4304896 |

|       |          |   |      |            |
|-------|----------|---|------|------------|
| TC058 | Tiabaya  | 1 | 2010 | SRS4304897 |
| TC127 | Tiabaya  | 5 | 2012 | SRS4304990 |
| TC139 | Tiabaya  | 4 | 2015 | SRS4304889 |
| TC140 | Tiabaya  | 2 | 2015 | SRS4304886 |
| TC153 | Tiabaya  | 3 | 2015 | SRS4304902 |
| TC154 | Tiabaya  | 3 | 2015 | SRS4304905 |
| TC156 | Tiabaya  | 3 | 2015 | SRS4304911 |
| TC063 | Uchumayo | 1 | 2010 | SRS4304879 |
| TC120 | Uchumayo | 1 | 2011 | SRS4304926 |
| TC138 | Vitor    | 1 | 2013 | SRS4304888 |
